# Supplementary material for: Interdisciplinary collaborations to address the uncertainty problem in life cycle assessment of nano-enabled products: case of the quantum dot-enabled display
Source: Royal Society of Chemistry journal article supplement (doi:10.1039/c9en00603f), 2019-01-01
Supplement: c9en00603f1.pdf [file c9en00603f1.pdf]

### Supplementary Information

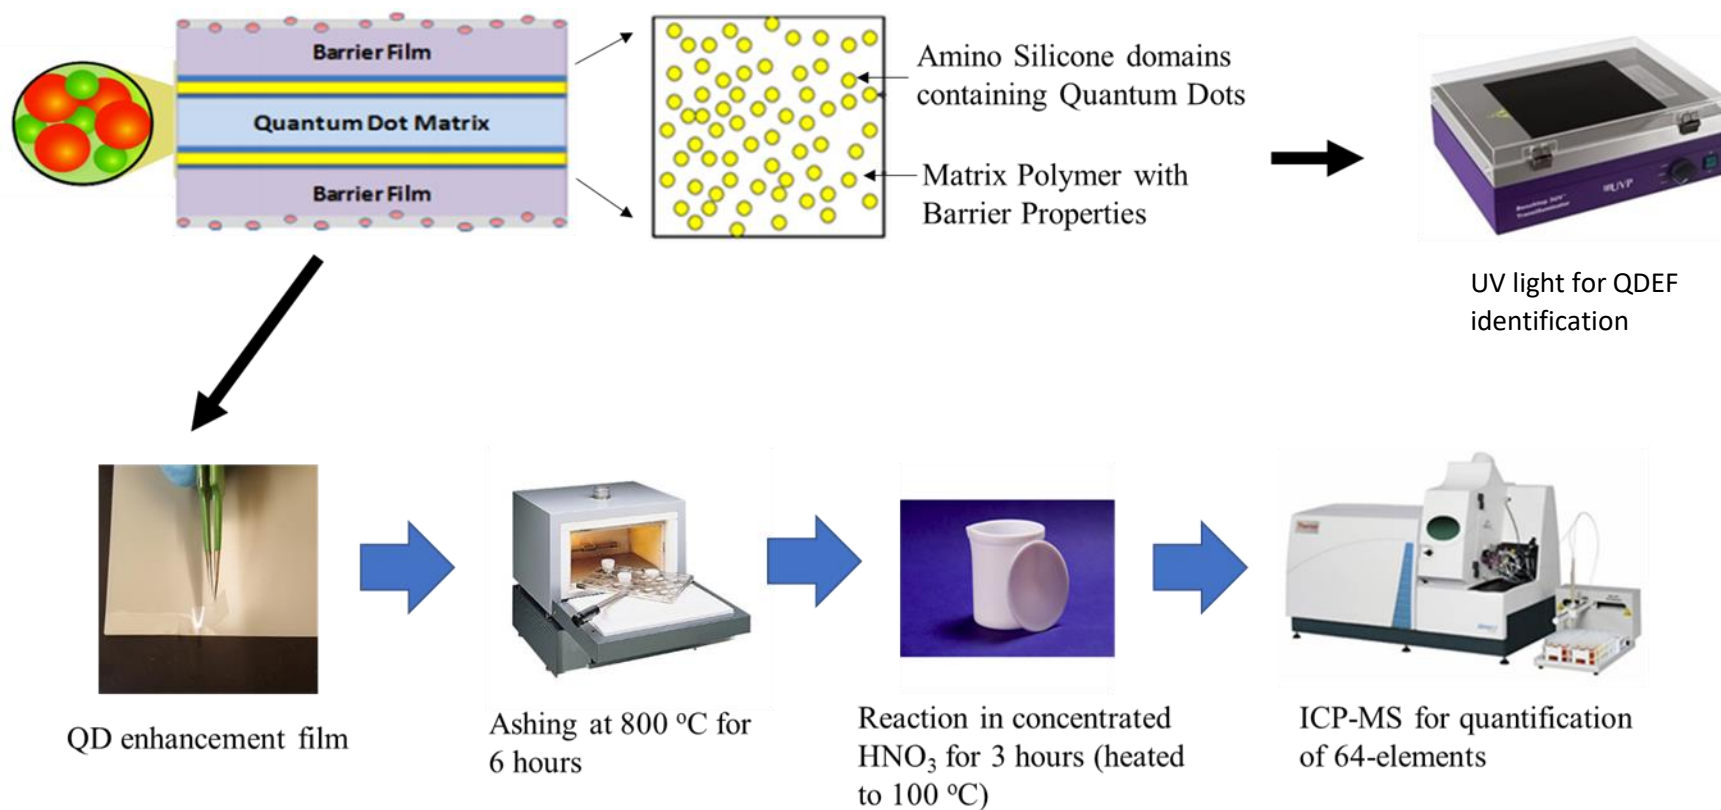

**Fig. S1.** Quantification for QD materials: Nitric acid digestion followed by ICP-MS

**Table S1** TCLP test for 2011 Kindle Fire Tablet with CdSe QD-enabled display

|                  | <b>Sample mass (g)</b> | <b>Leachant (g)</b> | <b>L/S ratio (g/g)</b> | <b>QD layer mass (g)</b> | <b>Initial Cd total (ug)</b> | <b>111Cd (ppb)</b> | <b>leached Cd mass (ug)</b> | <b>leached Cd (%)</b> | <b>Initial Zn total (ug)</b> | <b>68Zn (ppb)</b> | <b>leached Zn mass (ug)</b> | <b>leached Zn (%)</b> |
|------------------|------------------------|---------------------|------------------------|--------------------------|------------------------------|--------------------|-----------------------------|-----------------------|------------------------------|-------------------|-----------------------------|-----------------------|
| QD film_1        | 1.36                   | 27.23               | 20.02                  | 0.550                    | 172.98                       | 0.546              | 0.015                       | 0.009                 | 245.15                       | 554.4             | 15.096                      | 6.158                 |
| QD film_2        | 1.36                   | 27.24               | 20.03                  | 0.550                    | 172.98                       | 2.274              | 0.062                       | 0.036                 | 245.15                       | 126.4             | 3.443                       | 1.404                 |
| QD film_3        | 1.37                   | 27.43               | 20.02                  | 0.554                    | 174.25                       | 1.212              | 0.033                       | 0.019                 | 246.95                       | 300               | 8.229                       | 3.332                 |
| QD film_blank    | 0                      | 27.29               | \                      | n/a                      | n/a                          | 0.009              | 0.000                       |                       | n/a                          | 0                 | 0.000                       |                       |
| QD display_1     | 33.6                   | 671.71              | 19.99                  | n/a                      | n/a                          | 0.11               | 0.074                       |                       | n/a                          | 1517              | 1018.984                    |                       |
| QD display_2     | 33.83                  | 676.19              | 19.99                  | n/a                      | n/a                          | 0.058              | 0.039                       |                       | n/a                          | 456.3             | 308.545                     |                       |
| QD display_3     | 34.82                  | 696.62              | 20.01                  | n/a                      | n/a                          | 0.068              | 0.047                       |                       | n/a                          | 1330              | 926.505                     |                       |
| QD display_blank | 0                      | 682.61              | \                      | n/a                      | n/a                          | 0.009              | 0.006                       |                       | n/a                          | 2.428             | 1.657                       |                       |
| Average          |                        |                     |                        |                          |                              |                    |                             | 0.021                 |                              |                   |                             | 3.632                 |
| Error            |                        |                     |                        |                          |                              |                    |                             | 0.014                 |                              |                   |                             | 2.391                 |

**Table S2** TCLP test for 2016 Samsung TV set with InP QD-enabled display

|               | <b>Sample mass (g)</b> | <b>Leachant (g)</b> | <b>L/S ratio (g/g)</b> | <b>QD layer mass (g)</b> | <b>Initial In total (ug)</b> | <b>113In (ppb)</b> | <b>leached In mass (ug)</b> | <b>leached In (%)</b> | <b>Initial Zn total (ug)</b> | <b>68Zn (ppb)</b> | <b>leached Zn mass (ug)</b> | <b>leached Zn (%)</b> |
|---------------|------------------------|---------------------|------------------------|--------------------------|------------------------------|--------------------|-----------------------------|-----------------------|------------------------------|-------------------|-----------------------------|-----------------------|
| QD film_1     | 2.359                  | 48.07               | 20.38                  | 2.359                    | 166.37                       | 0.097              | 0.005                       | 0.003                 | 10228.96                     | 762.4             | 36.649                      | 0.358                 |
| QD film_2     | 2.445                  | 48.943              | 20.02                  | 2.445                    | 172.43                       | 0.029              | 0.001                       | 0.001                 | 10601.86                     | 732.5             | 35.851                      | 0.338                 |
| QD film_3     | 2.51                   | 50.649              | 20.18                  | 2.510                    | 177.02                       | 0.105              | 0.005                       | 0.003                 | 10883.71                     | 685.3             | 34.710                      | 0.319                 |
| QD film_blank | 0                      | 50.76               | \                      | n/a                      | n/a                          | 0.055              | 0.003                       | n/a                   | n/a                          | 0.924             | 0.047                       | n/a                   |
| Average       |                        |                     |                        |                          |                              |                    |                             | 0.002                 |                              |                   |                             | 0.338                 |
| Error         |                        |                     |                        |                          |                              |                    |                             | 0.001                 |                              |                   |                             | 0.020                 |

**Table S3** ICP digestion for 2011 Kindle Fire Tablet with CdSe QD-enabled display

|               | Crucible (g) | Crucible + PP (g) | After Ashing (g) | ICP tube (g) | Tube + digestant (g) | Dilution factor | <sup>111</sup> Cd (ppb) | Corrected Cd (ppb) | Cd mass (ug) | Cd loading (ug/g) | Cd loading (ug/cm <sup>2</sup> ) | <sup>68</sup> Zn (ppb) | Corrected Zn (ppb) | Zn mass (ug) | Zn loading (ug/g) | Zn loading (ug/cm <sup>2</sup> ) |
|---------------|--------------|-------------------|------------------|--------------|----------------------|-----------------|-------------------------|--------------------|--------------|-------------------|----------------------------------|------------------------|--------------------|--------------|-------------------|----------------------------------|
| Layer # rep 1 | 14.4058      | 14.7173           | 14.417           | 6.5943       | 14.3999              | 10              | 1244                    | 12440              | 97.102       | 311.723           | 2.280                            | 1756                   | 17560              | 137.066      | 440.020           | 3.218                            |
| Layer # rep 2 | 11.1248      | 11.4441           | 11.1362          | 6.533        | 12.8615              | 20              | 767.6                   | 15352              | 97.155       | 304.275           | 2.225                            | 1106                   | 22120              | 139.986      | 438.417           | 3.207                            |
| Layer # rep 3 | 15.635       | 16.0017           | 15.648           | 6.581        | 13.8781              | 10              | 1645                    | 16450              | 120.037      | 327.345           | 2.394                            | 2304                   | 23040              | 168.125      | 458.482           | 3.353                            |
| Barrier layer | 15.255       | 15.4519           | 15.2546          | 6.677        | 13.7673              | 10              | 0.019                   | 0.19               | 0.001        | 0.007             | 0.000                            | 5.113                  | 51.13              | 0.363        | 1.841             | 0.010                            |
| Average       |              |                   |                  |              |                      |                 |                         |                    |              | 314.448           | 2.300                            |                        |                    |              | 445.639           | 3.259                            |
| Error         |              |                   |                  |              |                      |                 |                         |                    |              | 11.774            | 0.086                            |                        |                    |              | 11.150            | 0.082                            |

**Table S4** ICP digestion for 2016 Samsung TV set with InP QD-enabled display

|               | Crucible (g) | Crucible + PP (g) | After Ashing (g) | ICP tube (g) | Tube + digestant (g) | Dilution factor | 113In (ppb) | Corrected In (ppb) | In mass (ug) | In loading (ug/g) | In loading (ug/cm <sup>2</sup> ) | 68Zn (ppb) | Corrected Zn (ppb) | Zn mass (ug) | Zn loading (ug/g) | Zn loading (ug/cm <sup>2</sup> ) | 31P (ppb) | Corrected P (ppb) | P mass (ug) | P loading (ug/g) | P loading (ug/cm <sup>2</sup> ) |
|---------------|--------------|-------------------|------------------|--------------|----------------------|-----------------|-------------|--------------------|--------------|-------------------|----------------------------------|------------|--------------------|--------------|-------------------|----------------------------------|-----------|-------------------|-------------|------------------|---------------------------------|
| Layer # rep 1 | 15.624<br>5  | 16.760<br>5       | 15.64<br>24      | 6.49<br>99   | 16.976<br>5          | 10              | 76.6        | 7660               | 80.2<br>51   | 70.64<br>3        | 2.809                            | 47330      | 473300             | 4958.5<br>75 | 4364.9<br>43      | 173.56<br>2                      | 2535      | 25350             | 265.5<br>82 | 233.7<br>87      | 9.296                           |
| Layer # rep 2 | 10.844<br>8  | 12.111<br>4       | 10.86<br>51      | 6.51<br>9    | 17.138<br>6          | 10              | 80.06       | 8006               | 85.0<br>21   | 67.12<br>5        | 2.669                            | 52400      | 524000             | 5564.6<br>70 | 4393.3<br>92      | 174.69<br>3                      | 2832      | 28320             | 300.7<br>47 | 237.4<br>44      | 9.441                           |
| Layer # rep 3 | 13.348<br>1  | 14.497<br>6       | 13.36<br>69      | 6.59<br>65   | 18.008<br>5          | 10              | 74.34       | 7434               | 84.8<br>37   | 73.80<br>3        | 2.935                            | 42810      | 428100             | 4885.4<br>77 | 4250.0<br>89      | 168.99<br>5                      | 2358      | 23580             | 269.0<br>95 | 234.0<br>97      | 9.308                           |
| Blank         | 14.615<br>9  | 14.615<br>9       | 14.61<br>59      | 6.69<br>1    | 17.816<br>4          | 10              | 0.026       | 0.26               | 0.00<br>3    | n/a               | n/a                              | 9.187      | 91.87              | 1.022        | n/a               | n/a                              | 0         | 0                 | 0.000       | n/a              | n/a                             |
| Average       |              |                   |                  |              |                      |                 |             |                    |              | 70.52<br>4        | 2.804                            |            |                    |              | 4336.1<br>41      | 172.41<br>7                      |           |                   |             | 235.1<br>10      | 9.349                           |
| Error         |              |                   |                  |              |                      |                 |             |                    |              | 3.341             | 0.133                            |            |                    |              | 75.869            | 3.017                            |           |                   |             | 2.028            | 0.081                           |

Given the mass constraints of QD material available for testing, the SW-846 Method 1311 was adapted to accommodate the amounts of waste materials but kept the mass to volume ratio constant.
